# Supplementary material for: Mixed metal bis(μ-oxo) complexes with [CuM(μ-O)2]n+(M = Ni(iii) or Pd(ii)) cores
Source: Royal Society of Chemistry journal article supplement (doi:10.1039/b404640d), 2004-01-01
Supplement: b404640d.pdf [file b404640d.pdf]

## Supporting Information

For

### Mixed Metal Bis( $\mu$ -oxo) Complexes with $[\text{CuM}(\mu\text{-O})_2]^{n+}$ (M = Ni(III) or Pd(II)) Cores

Nermeen W. Aboeella,<sup>a</sup> John T. York,<sup>a</sup> Anne M. Reynolds,<sup>a</sup> Koyu Fujita,<sup>b</sup> Christopher R. Kinsinger,<sup>a</sup> Christopher J. Cramer,<sup>a,\*</sup> Charles G. Riordan,<sup>b,\*</sup> and William B. Tolman<sup>a,\*</sup>

<sup>a</sup>Department of Chemistry, Center for Metals in Biocatalysis, and Supercomputer Institute, University of Minnesota, 207 Pleasant Street SE, Minneapolis, Minnesota, 55455, and <sup>b</sup>Department of Chemistry and Biochemistry, University of Delaware, Newark, Delaware 19716

## Experimental Details

**General Considerations.** All reagents were obtained from commercial sources and used as received unless stated otherwise. The solvents tetrahydrofuran (THF), diethyl ether (Et<sub>2</sub>O), pentane, and toluene were distilled from Na/benzophenone or passed through solvent purification columns (Glass Contour, Laguna, CA). Dichloromethane (CH<sub>2</sub>Cl<sub>2</sub>) was distilled from calcium hydride or purified by passing through a solvent purification column. Labeled dioxygen was purchased from Cambridge Isotopes, Inc. or Icon Isotopes, Inc. All metal complexes were prepared and stored in a Vacuum Atmospheres inert atmosphere glove box under a dry nitrogen atmosphere or were manipulated using standard Schlenk techniques. The compounds, [H(Me<sub>2</sub>L<sup>iPr2</sup>)Cu(MeCN)],<sup>1</sup> [H(Me<sub>2</sub>L<sup>Me2</sup>)Cu(MeCN)] (4),<sup>2</sup> (PPh<sub>3</sub>)<sub>2</sub>PdO<sub>2</sub> (5),<sup>3</sup> and PhTt<sup>tBu</sup>Ni(CO)<sup>4</sup> (2) were prepared as reported previously.

**Physical Methods.** NMR spectra were recorded on a Varian VI-300 or VXR-300 spectrometer. Chemical shifts (δ) for <sup>1</sup>H or <sup>13</sup>C NMR spectra were referenced to residual protium in the deuterated solvent, and for <sup>31</sup>P NMR spectra were referenced to external 85% H<sub>3</sub>PO<sub>4</sub> in H<sub>2</sub>O. UV-vis spectra were recorded on a HP8453 (190-1100 nm) diode array spectrophotometer. Low-temperature spectra were acquired using a custom manufactured vacuum dewar equipped with quartz windows, with low temperatures achieved with the use of a low-temperature MeOH bath circulator. X-band EPR spectra were recorded on a Bruker E-500 spectrometer, with an Oxford Instruments EPR-10 liquid helium cryostat (2-65K, 9.61 GHz). Quantitation of EPR signal intensity was achieved by comparing the double integration of the derivative spectrum to that of [H(Me<sub>2</sub>L<sup>iPr2</sup>)CuCl]<sup>5</sup> in 1:1 CH<sub>2</sub>Cl<sub>2</sub>/toluene. Resonance Raman spectra were collected on an Acton 506 spectrometer using a Princeton Instruments LN/CCD-1100-PB/UVAR detector and ST-1385 controller interfaced with Winspec software. A Spectra-Physics 2030-15 argon laser was used to excite at 457.9 nm. The power was between 60-200 mW. The spectra were obtained at -196 °C (77K) using a backscattering geometry; samples were frozen in a teflon cup or a copper cup attached to a liquid-nitrogen cooled cold-finger. Raman shifts were externally referenced to liquid indene.

**(PPh<sub>3</sub>)<sub>2</sub>Pd<sup>18</sup>O<sub>2</sub>.** A method adapted from the reported procedure for (PPh<sub>3</sub>)<sub>2</sub>Pd<sup>16</sup>O<sub>2</sub> was used.<sup>3</sup> In an inert atmosphere, a 50 mL Schlenk flask was charged with a suspension of Pd(PPh<sub>3</sub>)<sub>4</sub> (100 mg, 8.65 x 10<sup>-5</sup> mol) in Et<sub>2</sub>O (20 mL). The suspension was frozen at -196 °C, the headspace evacuated, and <sup>18</sup>O<sub>2</sub> transferred into the flask. Warming to ambient temperature and stirring for 15 min resulted in deposition of a green solid, which was collected, washed with Et<sub>2</sub>O (20 mL), and dried *in vacuo* (42 mg, 72%). FTIR: ν(<sup>18</sup>O-<sup>18</sup>O) = 828 cm<sup>-1</sup> (Δ<sup>16</sup>O<sub>2</sub>-<sup>18</sup>O<sub>2</sub> = 48 cm<sup>-1</sup>).

**UV-vis Experiments.** [H(Me<sub>2</sub>L<sup>iPr2</sup>)Cu(O<sub>2</sub>)] (1) + PhTt<sup>tBu</sup>Ni(CO) (2). In a typical experiment, [H(Me<sub>2</sub>L<sup>iPr2</sup>)Cu(O<sub>2</sub>)] (1) was prepared *in situ* by oxygenating a THF solution of [H(Me<sub>2</sub>L<sup>iPr2</sup>)Cu(MeCN)] at -80 °C in a UV cell. After complete formation of

<sup>1</sup> Spencer, D. J. E.; Aboeella, N. W.; Reynolds, A. M.; Holland, P. L.; Tolman, W. B. *J. Am. Chem. Soc.* **2002**, *124*, 2108.

<sup>2</sup> Spencer, D. J. E.; Reynolds, A. M.; Holland, P. L.; Jazdzewski, B. A.; Duboc-Toia, C.; Le Pape, L.; Yokota, S.; Tachi, Y.; Itoh, S.; Tolman, W. B. *Inorg. Chem.* **2002**, *41*, 6307.

<sup>3</sup> Nyman, C. J.; Wymore, C. E.; Wilkinson, G. *J. Chem. Soc. (A)* **1968**, 561.

<sup>4</sup> Scebler, P. J.; Mandimutsira, B. S.; Riordan, C. G.; Liable-Sands, L. M.; Incarvito, C. D.; Rheingold, A. L. *J. Am. Chem. Soc.*, **2001**, *123*, 331.

<sup>5</sup> Holland, P. L.; Tolman, W. B. *J. Am. Chem. Soc.* **1999**, *121*, 7270.

[H(Me<sub>2</sub>L<sup>iPr2</sup>)Cu(O<sub>2</sub>)] (monitored by UV-vis spectroscopy), excess O<sub>2</sub> was removed by evacuating and purging the UV-vis cell several times with N<sub>2</sub> and then bubbling argon through the solution for approximately 20 min while maintaining a temperature of -80 °C. The UV-vis spectrum was then recorded in order to confirm that no degradation of the spectral features had occurred. One equivalent of PhTt<sup>tBu</sup>Ni(CO) was then injected via syringe, and product formation was monitored at -80 °C over ~1 d. Final mixed concentrations (assuming dimer formation) were between 0.6-1.0 mM. Extinction coefficients are reported per complex (assuming dimer formation). λ<sub>max</sub>, nm (ε, M<sup>-1</sup>cm<sup>-1</sup>): 440 (br, 8500), 498 (8300).

**(PPh<sub>3</sub>)<sub>2</sub>PdO<sub>2</sub> (5) + [H(Me<sub>2</sub>L<sup>Me2</sup>)Cu(NCCH<sub>3</sub>)] (4).** In an inert atmosphere glovebox, a 4 mL sample of a stock solution of (PPh<sub>3</sub>)<sub>2</sub>PdO<sub>2</sub> (5) in THF (0.2 mM) was placed in a UV cuvette, which was removed from the box and cooled to -80 °C. An initial spectrum was recorded to verify the starting material (shoulder at 335 nm).<sup>6</sup> A sample from a stock solution (0.2 mM) of [H(Me<sub>2</sub>L<sup>Me2</sup>)Cu(NCCH<sub>3</sub>)] (4) in THF (1 equiv) was injected, resulting in an immediate color change to dark yellow-brown and the appearance of new absorption bands: λ<sub>max</sub>, nm (ε, M<sup>-1</sup>cm<sup>-1</sup>): 448 (5900), 600 (sh, 450). A spectrophotometric titration was performed according to a similar protocol, using 0.25-2.0 equiv of Cu(I) reagent and monitoring at 448 nm (Figure S1).

**Resonance Raman, EPR, and NMR Experiments.** Similar protocols to those used in the UV-vis experiments were followed, except final concentrations were 1.0 mM (EPR, NMR) or ~10 mM (Raman) and solutions were prepared in the appropriate sample containers (teflon cup or coldfinger/Cu cup for Raman, quartz tubes for EPR and NMR).

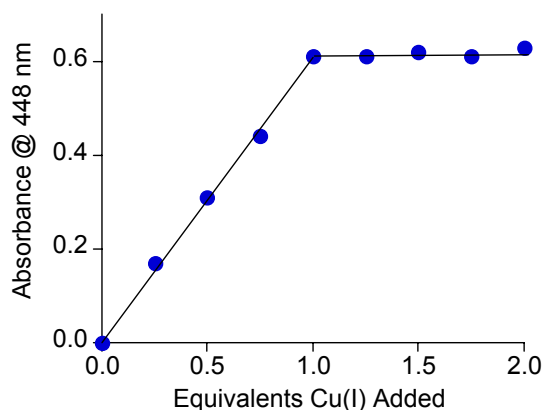

**Figure S1.** Plot showing results of spectrophotometric titration of (PPh<sub>3</sub>)<sub>2</sub>PdO<sub>2</sub> (5) with [H(Me<sub>2</sub>L<sup>Me2</sup>)Cu(NCCH<sub>3</sub>)] (4) in THF at -80 °C.

<sup>6</sup> Deal, D.; Zink, J.I. *Inorg. Chem.* **1981**, *20*, 3995.

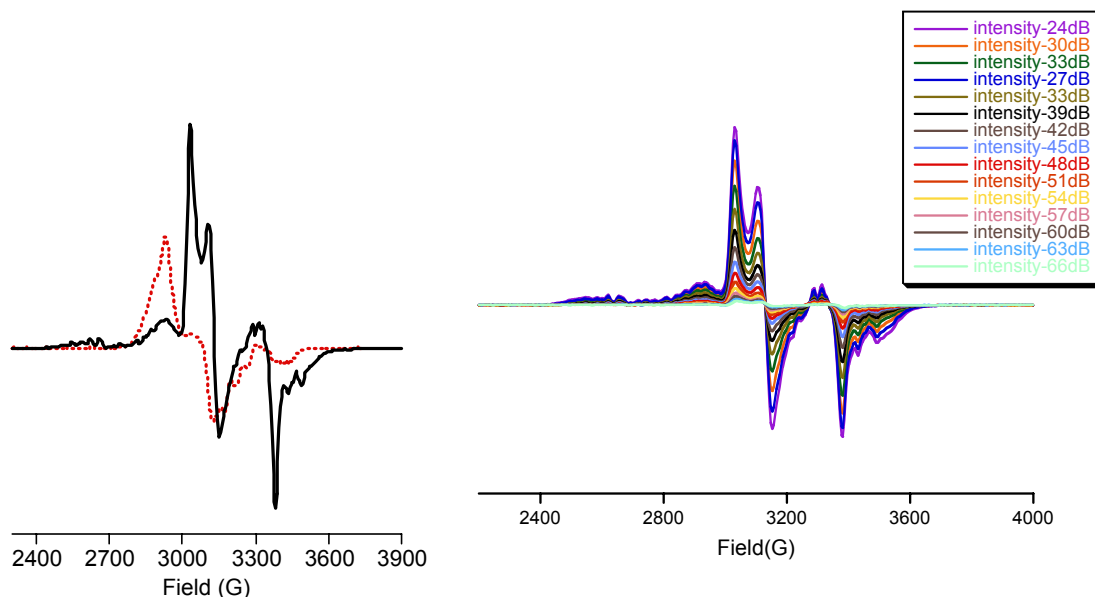

**Figure S2.** EPR spectra of the solution obtained upon mixing  $[\text{H}(\text{Me}_2\text{L}^{\text{iPr}_2})\text{Cu}(\text{O}_2)]$  (**1**) and  $\text{PhTt}^{\text{tBu}}\text{Ni}(\text{CO})$  (**2**) at  $-80\text{ }^\circ\text{C}$ . Left: Solid black line is same as shown in Figure 1b, and dashed red line is of the solution resulting after warming to room temperature. Right: Overlay of spectra obtained at various microwave powers. All spectra obtained at 2K, 9.6 GHz.

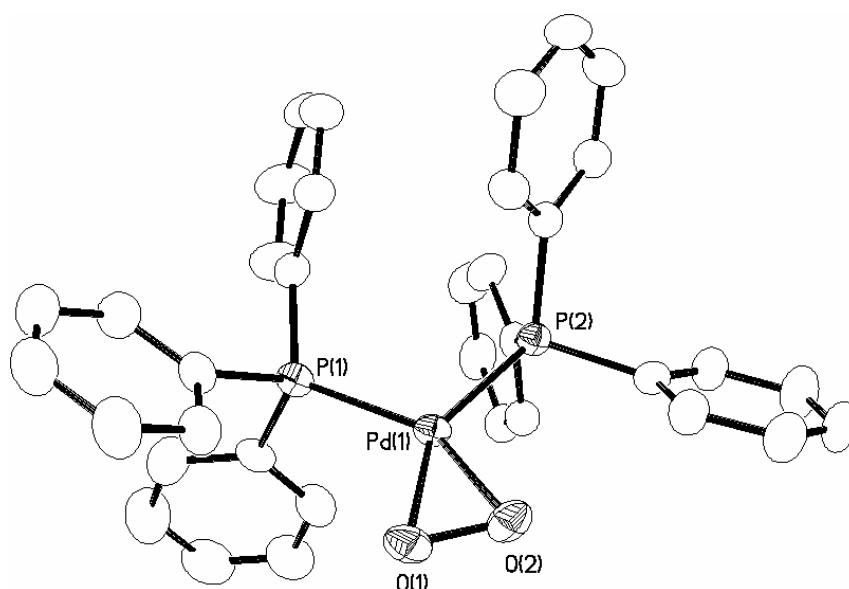

**Figure S3.** X-ray crystal structure of  $(\text{PPh}_3)_2\text{PdO}_2$  (**5**), with all nonhydrogen atoms shown as 50% thermal ellipsoids.

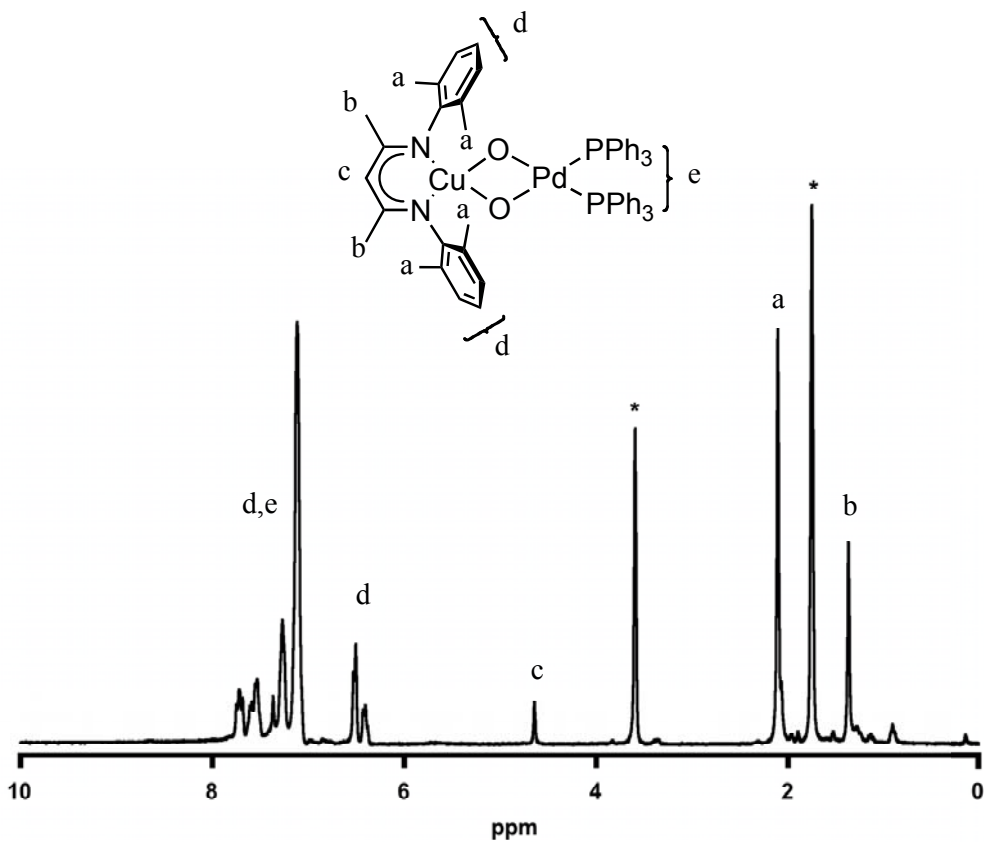

**Figure S4.** <sup>1</sup>H NMR spectrum of (PPh<sub>3</sub>)<sub>2</sub>Pd(μ-O)<sub>2</sub>Cu[H(Me<sub>2</sub>L<sup>Me2</sup>)] (**6**) (THF-d<sub>8</sub>, -80 °C). The peaks labeled with \* are from the solvent.

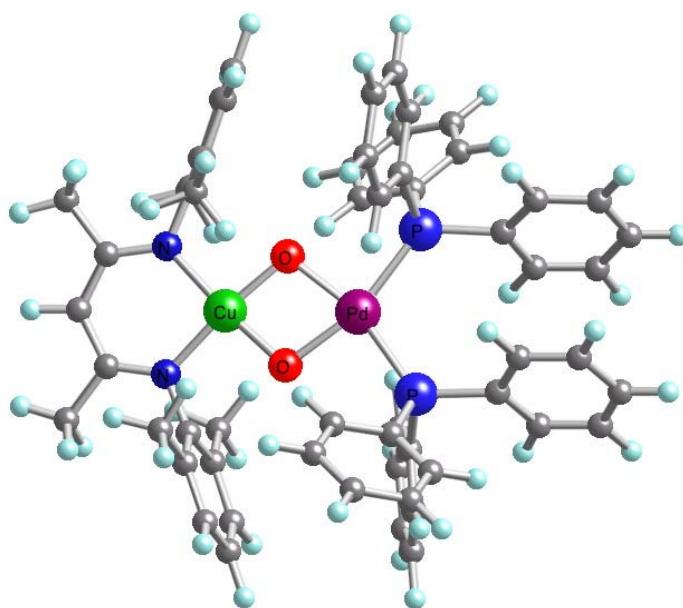

**Figure S5.** Calculated structure of  $(\text{PPh}_3)_2\text{Pd}(\mu\text{-O})_2\text{Cu}[\text{H}(\text{Me}_2\text{L}^{\text{Me}_2})]$  (**6**).

### Calculations Details

The molecular geometry of **6** was fully optimized at the density functional level of theory (DFT) using the exchange and correlation functionals of Perdew and co-workers<sup>7,8</sup> as modified by Adamo and Barone (*mPWPW91*).<sup>9</sup> Atomic orbital basis functions were taken for Cu and Pd from the Stuttgart/Dresden relativistic effective core potential basis SDD,<sup>10</sup> for N, O, and P from the 6-311G\* basis, for C from the 6-31G basis, and for H from the minimal STO-3G basis.<sup>11</sup> Calculations employed the Gaussian 03 electron structure program suite.<sup>12</sup>

Optimized cartesian coordinates (Å)

Cu,0,2.5327510324,0.,0.  
Pd,0,-0.4612346066,0.,0.  
O,0,1.1526697599,1.2296062139,0.0060479793  
O,0,1.1526697599,-1.2296062139,-0.0060479793  
N,0,3.8584025034,1.4253832583,-0.1499380554  
N,0,3.8584025034,-1.4253832583,0.1499380554  
C,0,5.1924349795,1.2492694925,-0.170821499  
C,0,5.1924349795,-1.2492694925,0.170821499

<sup>7</sup> Perdew, J. & Wang, Y. (1992) *Phys. Rev. B* **45**, 13244-13249.

<sup>8</sup> Burke, K., Perdew, J. P. & Wang, Y. (1998) in *Electronic Density Functional Theory. Recent Progress and New Directions*, eds. Dobson, J. F., Vignale, G. & Das, M. P. (Plenum Press, New York), pp. 81-121.

<sup>9</sup> Adamo, C. & Barone, V. (1998) *J. Chem. Phys.* **108**, 664-675.

<sup>10</sup> Dolg, M. (2002) *Theor. Comput. Chem.* **11**, 793.

<sup>11</sup> Hehre, W. J., Radom, L., von Schleyer, P. R. & Pople, J. A. (1986) *Ab Initio Molecular Orbital Theory* (Wiley, New York).

<sup>12</sup> Frisch, M. J., Trucks, G. W., Schlegel, H. B., Scuseria, G. E., Robb, M. A., Cheeseman, J. R., Montgomery, J. A., Vreven, T., Kudin, K. N., Burant, J. C., Millam, J. M., Iyengar, S. S., Tomasi, J., Barone, V., Mennucci, B., Cossi, M., Scalmani, G., Rega, N., Petersson, G. A., Nakatsuji, H., Hada, M., Ehara, M., Toyota, K., Fukuda, R., Hasegawa, J., Ishida, M., Nakajima, T., Honda, Y., Kitao, O., Nakai, H., Klene, M., Li, X., Knox, J. E., Hratchian, H. P., Cross, J. B., Adamo, C., Jaramillo, J., Gomperts, R., Stratmann, R. E., Yazyev, O., Austin, A. J., Cammi, R., Pomelli, C., Ochterski, J. W., Ayala, P. Y., Morokuma, K., Voth, G. A., Salvador, P., Dannenberg, J. J., Zakrzewski, V. G., Dapprich, S., Daniels, A. D., Strain, M. C., Farkas, O., Malick, D. K., Rabuck, A. D., Raghavachari, K., Foresman, J. B., Ortiz, J. V., Cui, Q., Baboul, A. G., Clifford, S., Cioslowski, J., Stefanov, B. B., Liu, G., Liashenko, A., Piskorz, P., Komaromi, I., Martin, R. L., Fox, D. J., Keith, T., Al-Laham, M. A., Peng, C. Y., Nanayakkara, A., Challacombe, M., Gill, P. M. W., Johnson, B., Chen, W., Wong, M. W., Gonzalez, C. & Pople, J. A. (2003) *Gaussian 03 (Revision B.01)* (Gaussian, Inc., Pittsburgh, PA).

C,0,5.8214825638,0.,0.  
C,0,3.337715119,2.7581541776,-0.2282947789  
C,0,3.337715119,-2.7581541776,0.2282947789  
C,0,3.2601583134,3.5399042218,0.9556260989  
C,0,3.2601583134,-3.5399042218,-0.9556260989  
C,0,2.9150297943,3.2765487088,-1.4808192027  
C,0,2.9150297943,-3.2765487088,1.4808192027  
C,0,2.7947347539,4.865332416,0.8592664869  
C,0,2.7947347539,-4.865332416,-0.8592664869  
C,0,2.4590019724,4.607590987,-1.5372117142  
C,0,2.4590019724,-4.607590987,1.5372117142  
C,0,2.4032478601,5.4011730364,-0.379382171  
C,0,2.4032478601,-5.4011730364,0.379382171  
P,0,-1.8235143818,1.8809109776,0.1250639667  
P,0,-1.8235143818,-1.8809109776,-0.1250639667  
H,0,6.9130962662,0.,0.  
C,0,6.0988199279,2.45541882,-0.3991714856  
C,0,6.0988199279,-2.45541882,0.3991714856  
C,0,3.664024652,2.9468415316,2.2894470997  
C,0,3.664024652,-2.9468415316,-2.2894470997  
C,0,2.9457839654,2.4046669539,-2.7161629368  
C,0,2.9457839654,-2.4046669539,2.7161629368  
H,0,2.730697033,5.4754959159,1.7669937209  
H,0,2.730697033,-5.4754959159,-1.7669937209  
H,0,2.1303687471,5.015702398,-2.4989782789  
H,0,2.1303687471,-5.015702398,2.4989782789  
H,0,2.0417339817,6.4335210072,-0.4394589112  
H,0,2.0417339817,-6.4335210072,0.4394589112  
C,0,-3.6730606159,1.8320006766,0.2224189628  
C,0,-3.6730606159,-1.8320006766,-0.2224189628  
C,0,-1.4577562464,2.9252486909,1.6151266549  
C,0,-1.4577562464,-2.9252486909,-1.6151266549  
C,0,-1.5220194464,2.9725971369,-1.3350000441  
C,0,-1.5220194464,-2.9725971369,1.3350000441  
C,0,-4.2602052129,1.164311021,1.3246109173  
C,0,-4.5132524036,2.4805898314,-0.7103118061  
C,0,-5.6519335533,1.1708390375,1.5040882697  
C,0,-5.9096420497,2.4795694938,-0.5308851685  
C,0,-6.4811530679,1.8332814586,0.5782449587  
H,0,-3.6186341673,0.6470540071,2.0487622446  
H,0,-4.0768886398,2.9990605956,-1.5700980044  
H,0,-6.0897498918,0.6537666163,2.3643453528  
H,0,-6.5479637883,2.9929504075,-1.258631919  
H,0,-7.5673764936,1.8398313151,0.7205956582  
C,0,-4.2602052129,-1.164311021,-1.3246109173  
C,0,-4.5132524036,-2.4805898314,0.7103118061

C,0,-5.6519335533,-1.1708390375,-1.5040882697  
C,0,-5.9096420497,-2.4795694938,0.5308851685  
C,0,-6.4811530679,-1.8332814586,-0.5782449587  
H,0,-3.6186341673,-0.6470540071,-2.0487622446  
H,0,-4.0768886398,-2.9990605956,1.5700980044  
H,0,-6.0897498918,-0.6537666163,-2.3643453528  
H,0,-6.5479637883,-2.9929504075,1.258631919  
H,0,-7.5673764936,-1.8398313151,-0.7205956582  
C,0,-2.4098895514,3.8339772551,2.139863512  
C,0,-0.2027724429,2.7921585738,2.2536671059  
C,0,-2.1129833966,4.5923878945,3.2854250832  
C,0,0.0809304857,3.5480467797,3.405823574  
C,0,-0.8689282967,4.4455670188,3.9257569075  
H,0,-3.3910669138,3.9380521273,1.6643219267  
H,0,0.5399984198,2.1089946091,1.8124260078  
H,0,-2.8591298763,5.2900459994,3.6816880394  
H,0,1.0513843341,3.430444785,3.899298176  
H,0,-0.6426455232,5.0276485783,4.8262964507  
C,0,-2.4098895514,-3.8339772551,-2.139863512  
C,0,-0.2027724429,-2.7921585738,-2.2536671059  
C,0,-2.1129833966,-4.5923878945,-3.2854250832  
C,0,0.0809304857,-3.5480467797,-3.405823574  
C,0,-0.8689282967,-4.4455670188,-3.9257569075  
H,0,-3.3910669138,-3.9380521273,-1.6643219267  
H,0,0.5399984198,-2.1089946091,-1.8124260078  
H,0,-2.8591298763,-5.2900459994,-3.6816880394  
H,0,1.0513843341,-3.430444785,-3.899298176  
H,0,-0.6426455232,-5.0276485783,-4.8262964507  
C,0,-1.6572090832,4.3784161546,-1.2817873741  
C,0,-1.182985367,2.3579787547,-2.5624968381  
C,0,-1.4802621483,5.1517762064,-2.4425272919  
C,0,-1.0125265685,3.1335832725,-3.7227161857  
C,0,-1.1653907119,4.5312512662,-3.665925615  
H,0,-1.890047319,4.8685415355,-0.3300848595  
H,0,-1.0299227435,1.2706693669,-2.5897797996  
H,0,-1.583375361,6.24116164,-2.3891403245  
H,0,-0.7483332514,2.6449858094,-4.6672665361  
H,0,-1.0292071623,5.1360383866,-4.5695211137  
C,0,-1.6572090832,-4.3784161546,1.2817873741  
C,0,-1.182985367,-2.3579787547,2.5624968381  
C,0,-1.4802621483,-5.1517762064,2.4425272919  
C,0,-1.0125265685,-3.1335832725,3.7227161857  
C,0,-1.1653907119,-4.5312512662,3.665925615  
H,0,-1.890047319,-4.8685415355,0.3300848595  
H,0,-1.0299227435,-1.2706693669,2.5897797996  
H,0,-1.583375361,-6.24116164,2.3891403245



H,0,-0.7483332514,-2.6449858094,4.6672665361  
H,0,-1.0292071623,-5.1360383866,4.5695211137  
H,0,5.8524528794,2.9527922501,-1.3559476031  
H,0,5.9753261136,3.2139510421,0.3949227809  
H,0,7.1560718485,2.1458188211,-0.4272122914  
H,0,5.8524528794,-2.9527922501,1.3559476031  
H,0,5.9753261136,-3.2139510421,-0.3949227809  
H,0,7.1560718485,-2.1458188211,0.4272122914  
H,0,3.0920737207,2.0182326708,2.48789847  
H,0,4.7339917732,2.6647540295,2.3169786156  
H,0,3.4798425985,3.6595448962,3.1106222809  
H,0,2.2554626116,1.5473476416,-2.579150455  
H,0,2.6286664958,2.9689354119,-3.6087611491  
H,0,3.9518508886,1.9829179378,-2.9032225541  
H,0,3.0920737207,-2.0182326708,-2.48789847  
H,0,4.7339917732,-2.6647540295,-2.3169786156  
H,0,3.4798425985,-3.6595448962,-3.1106222809  
H,0,2.2554626116,-1.5473476416,2.579150455  
H,0,2.6286664958,-2.9689354119,3.6087611491  
H,0,3.9518508886,-1.9829179378,2.9032225541
